# Supplementary material for: NCAPD2 Is a Favorable Predictor of Prognostic and Immunotherapeutic Biomarker for Multiple Cancer Types Including Lung Cancer
Source: Research Square preprint supplement (doi:10.21203/rs.3.rs-2011626/v1), 2022-09-12
Supplement: Supplementary file 1 [file 2f94fc4b4848bb75f03a9667.xlsx]

## Sheet: SheetName
cancertype	symbol	stagetype	stage1	stage2	stage3	stage4	pval	fdr	entrez
TGCT	NCAPD2	pathologic_stage	4100/56	6000/12	7500/14		2.7594e-05	0.0126782	9918
BRCA	NCAPD2	pathologic_stage	1800/182	2300/626	1800/252	1800/20	6.7404e-05	0.00912573	9918
KIRP	NCAPD2	pathologic_stage	1000/172	1100/22	1200/52	1500/15	0.000141804	0.00350199	9918
KIRC	NCAPD2	pathologic_stage	870/268	870/57	980/123	1300/84	0.000166598	0.00114677	9918
LUAD	NCAPD2	pathologic_stage	1700/277	2000/122	2200/84	2100/26	0.000842392	0.0433229	9918
TGCT	NCAPD2	clinical_stage	4500/52	5200/17	7200/15		0.000878323	0.0798294	9918
KIRP	NCAPD2	clinical_stage	1000/140	1000/21	1200/29	1300/11	0.00190647	0.0323775	9918
ACC	NCAPD2	pathologic_stage	960/9	1200/37	1400/16	2000/15	0.00219805	0.0950057	9918
SKCM	NCAPD2	pathologic_stage	2900/78	2600/140	2600/171	2000/24	0.00391604	0.047471	9918
LIHC	NCAPD2	pathologic_stage	690/173	870/87	1100/85	480/5	0.00583276	0.122199	9918
CESC	NCAPD2	clinical_stage	3200/162	3600/69	3400/46	3800/22	0.0144545	0.334213	9918
OV	NCAPD2	clinical_stage		4900/22	4100/246	3200/38	0.0172185	0.224088	9918
TGCT	NCAPD2	igcccg_stage	5100/32 (stage good)	7500/9 (stage intermediate)			0.0407025	0.876249	9918
ESCA	NCAPD2	pathologic_stage	3200/19	4600/78	3800/56	4700/9	0.0441609	0.271666	9918
KICH	NCAPD2	pathologic_stage	820/21	1100/25	910/14	1600/6	0.0511642	0.363745	9918
THYM	NCAPD2	masaoka_stage		3600/61	2600/15	2500/6	0.0903427	0.654476	9918
UVM	NCAPD2	clinical_stage		1300/36	1400/40		0.18236	0.671701	9918
UVM	NCAPD2	pathologic_stage		1300/39	1400/36		0.242832	0.982061	9918
HNSC	NCAPD2	clinical_stage	3200/20	3400/98	3100/105	3600/285	0.259143	0.585471	9918
PAAD	NCAPD2	pathologic_stage	1200/21	1500/147		1300/5	0.278357	0.50404	9918
LUSC	NCAPD2	pathologic_stage	4000/245	4200/162	4100/84	3200/7	0.351865	0.661759	9918
UCS	NCAPD2	clinical_stage	3300/22	3500/5	3500/20	4000/10	0.387362	0.693665	9918
ESCA	NCAPD2	clinical_stage		5700/30	4400/21	4700/11	0.523693	0.876936	9918
UCEC	NCAPD2	clinical_stage	2400/98	2400/24	2600/45	3100/10	0.534421	0.886396	9918
STAD	NCAPD2	pathologic_stage	3000/57	2900/123	3000/171	2700/41	0.547249	0.7496	9918
BLCA	NCAPD2	pathologic_stage		2700/130	2900/140	2700/134	0.566602	0.729565	9918
COAD	NCAPD2	pathologic_stage	3000/45	3000/111	2900/81	2800/39	0.602097	0.78618	9918
READ	NCAPD2	pathologic_stage	3000/12	2800/26	2800/33	2800/13	0.61724	0.877666	9918
THCA	NCAPD2	pathologic_stage	1000/288	1000/51	1000/111	1000/57	0.628896	0.729724	9918
CHOL	NCAPD2	pathologic_stage	1400/19	1300/9		1700/7	0.713351	0.99976	9918
HNSC	NCAPD2	pathologic_stage	3000/27	3400/74	3200/81	3200/268	0.714005	0.861095	9918
DLBC	NCAPD2	clinical_stage	3300/8	3500/17	3700/5	3300/12	0.736927	0.994036	9918
MESO	NCAPD2	pathologic_stage	2200/10	1600/16	1900/45	1900/16	0.957309	0.985171	9918
