# Supplementary material for: NCAPD2 Is a Favorable Predictor of Prognostic and Immunotherapeutic Biomarker for Multiple Cancer Types Including Lung Cancer
Source: Research Square preprint supplement (doi:10.21203/rs.3.rs-2011626/v1), 2022-09-12
Supplement: Supplementary file 2 [file 37c77aae2805aab05c1e23e0.xlsx]

## Sheet: Sheet1
Cancer acronyms	Cancer full name
ACC	Adrenocortical carcinoma
BRCA	Breast invasive carcinoma
CESC	Cervical squamous cell carcinoma and endocervical adenocarcinoma
COAD	Colon adenocarcinoma
DLBC	Lymphoid Neoplasm Diffuse Large B-cell Lymphoma
ESCA	Esophageal carcinoma
GBM	Glioblastoma multiforme
HNSC	Head and Neck squamous cell carcinoma
LAML	Acute Myeloid Leukemia
LGG	Brain Lower Grade Glioma
LIHC	Liver hepatocellular carcinoma
MESO	Mesothelioma
OV	Ovarian serous cystadenocarcinoma
PAAD	Pancreatic adenocarcinoma
SARC	Sarcomav
SKCM	Skin Cutaneous Melanoma
STAD	Stomach adenocarcinoma
TGCT	Testicular Germ Cell Tumors
THYM	Thymoma
UCEC	Uterine Corpus Endometrial Carcinoma
UCS	Uterine Carcinosarcoma
HCC	hepatocellular carcinoma
clear RCC	clear cell renal cell carcinoma
