# Supplementary material for: NCAPD2 Is a Favorable Predictor of Prognostic and Immunotherapeutic Biomarker for Multiple Cancer Types Including Lung Cancer
Source: Research Square preprint supplement (doi:10.21203/rs.3.rs-2011626/v1), 2022-09-12
Supplement: Supplementary file 3 [file 9140a9bc7afb31c610558875.docx]

**Supplementary Materials**

Supplementary Table 1: the cancer types included in the TCGA pan-cancer data. Supplementary Figure 1: analysis of NCAPD2 expression levels in ACC, LAML and UCS based on GEPIA2 database. Supplementary Table 2: correlation between the NCAPD2 expression and the clinical stage in pan-cancer.Supplementary Table 3: the top 60 genes most similar to NCAPD2 in GEPIA2 database.
