# Supplementary material for: NCAPD2 Is a Favorable Predictor of Prognostic and Immunotherapeutic Biomarker for Multiple Cancer Types Including Lung Cancer
Source: Research Square preprint supplement (doi:10.21203/rs.3.rs-2011626/v1), 2022-09-12
Supplement: Supplementary file 4 [file f9bbdc282d43bcc90bd6e09c.xlsx]

## Sheet: Sheet1
Gene Symbol	Gene ID	PCC
FOXM1	ENSG00000111206.12	0.81
RAD51AP1	ENSG00000111247.14	0.8
CDCA3	ENSG00000111665.11	0.74
KIF18B	ENSG00000186185.13	0.71
KIF11	ENSG00000138160.5	0.7
NOP2	ENSG00000111641.10	0.7
RHNO1	ENSG00000171792.10	0.69
BUB1	ENSG00000169679.14	0.69
NCAPH	ENSG00000121152.9	0.69
TPX2	ENSG00000088325.15	0.68
PLK1	ENSG00000166851.14	0.68
KIF23	ENSG00000137807.13	0.68
INCENP	ENSG00000149503.12	0.68
KIF14	ENSG00000118193.11	0.68
KIF18A	ENSG00000121621.6	0.67
GSG2	ENSG00000177602.5	0.67
ESPL1	ENSG00000135476.11	0.67
MKI67	ENSG00000148773.12	0.67
KIF2C	ENSG00000142945.12	0.66
ZNF384	ENSG00000126746.17	0.66
KIF4A	ENSG00000090889.11	0.66
CCNB2	ENSG00000157456.7	0.66
CCNA2	ENSG00000145386.9	0.66
CKAP2L	ENSG00000169607.12	0.66
TMPO	ENSG00000120802.13	0.65
TTK	ENSG00000112742.9	0.65
MCM4	ENSG00000104738.16	0.65
NUSAP1	ENSG00000137804.12	0.65
RACGAP1	ENSG00000161800.12	0.65
GTSE1	ENSG00000075218.18	0.65
TICRR	ENSG00000140534.13	0.65
HJURP	ENSG00000123485.11	0.65
CCNF	ENSG00000162063.12	0.65
MCM10	ENSG00000065328.16	0.65
LMNB2	ENSG00000176619.10	0.65
KIF20A	ENSG00000112984.11	0.64
ARHGAP11A	ENSG00000198826.10	0.64
LMNB1	ENSG00000113368.11	0.64
ASPM	ENSG00000066279.16	0.64
CLSPN	ENSG00000092853.13	0.64
CENPO	ENSG00000138092.10	0.64
DLGAP5	ENSG00000126787.12	0.64
CENPF	ENSG00000117724.12	0.64
CENPI	ENSG00000102384.13	0.63
CCDC77	ENSG00000120647.9	0.63
STIL	ENSG00000123473.15	0.63
KIF20B	ENSG00000138182.14	0.63
SGOL1	ENSG00000129810.14	0.63
MCM2	ENSG00000073111.13	0.62
MCM8	ENSG00000125885.13	0.62
NCAPG	ENSG00000109805.9	0.62
POLQ	ENSG00000051341.13	0.62
SGOL2	ENSG00000163535.17	0.62
ORC1	ENSG00000085840.12	0.62
CEP55	ENSG00000138180.15	0.62
GINS1	ENSG00000101003.9	0.62
KIAA1524	ENSG00000163507.13	0.62
CDCA5	ENSG00000146670.9	0.62
SENP1	ENSG00000079387.13	0.61
HMMR	ENSG00000072571.19	0.61
